# Supplementary material for: Kinetic Features of 3′-5′ Exonuclease Activity of Human AP-Endonuclease APE1
Source: PubMed Central journal article supplement (PMC6225374; doi:10.3390/molecules23092101), 2018-08-21
Supplement: molecules-23-02101-s001.pdf [file molecules-23-02101-s001.pdf]

## Supplementary Material

### **Kinetic Features of 3'-5' Exonuclease Activity of Human AP-Endonuclease APE1**

**Alexandra A. Kuznetsova<sup>1</sup>, Olga S. Fedorova<sup>1,2,\*</sup> and Nikita A. Kuznetsov<sup>1,2,\*</sup>**

<sup>1</sup>Institute of Chemical Biology and Fundamental Medicine, Siberian Branch of the Russian Academy of Sciences, Novosibirsk, 630090, Russia

<sup>2</sup>Department of Natural Sciences, Novosibirsk State University, Novosibirsk 630090, Russia

\* Correspondence: fedorova@niboch.nsc.ru (O.S.F.); nikita.kuznetsov@niboch.nsc.ru (N.A.K.);  
Tel.: +7 383-363-5175 (O.S.F.); +7 383-363-5174(N.A.K.); Fax: +7 383-363-5153 (O.S.F. and  
N.A.K)

## Protein purification

The cell lysate was centrifuged (40,000×g, 40 min), and the supernatant was loaded onto column I (Q-Sepharose Fast Flow, Amersham Biosciences, Sweden) with subsequent washing with buffer solution I (20 mM HEPES-NaOH, pH 7.8) containing 100 mM NaCl. Fractions containing the protein were collected and loaded onto column II (HiTrap-Heparin™ Amersham Biosciences, Sweden) in buffer solution II (20 mM HEPES-NaOH, pH 7.8) containing 40 mM NaCl. Chromatography was run in buffer solution II and a linear gradient of 40 → 600 mM NaCl. The solution's absorbance was detected at a wavelength of 280 nm and 292 nm (Figure S1A). The protein purity was determined by gel electrophoresis (Figure S1B). Fraction 2 (see lane 7) was used in the work.

**A**

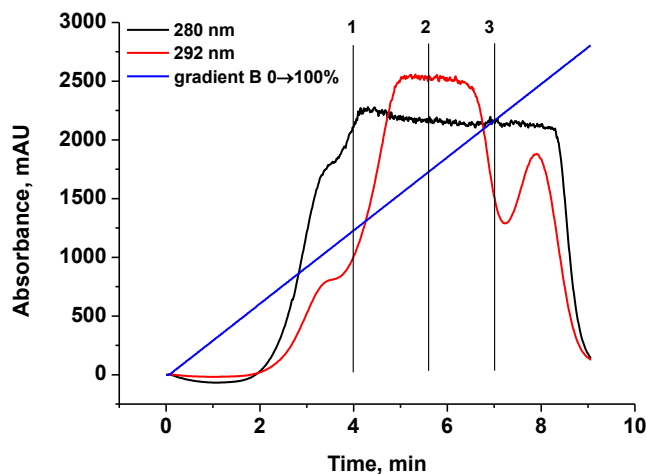

**B**

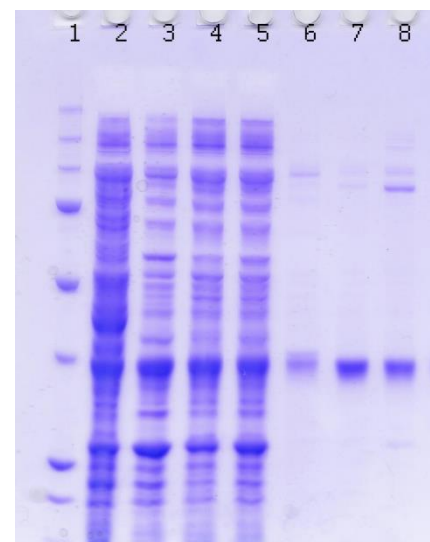

Figure S1. APE1 purification. (A) Proteins elution from Heparin column in a 40–600 mM NaCl gradient. (B) PAGE analysis of APE1 purification: 1, protein marker (250, 150,100, 75, 50, 37, 25, 20 kDa); 2, total cell lysate; 3, flow through Q sepharose (last drop); 4, flow through Q sepharose (for loading on Heparin); 5, flow through Heparin; 6, fraction 1; 7, fraction 2; 8, fraction 3.
